# Supplementary material for: High-Level Conversion of l-lysine into Cadaverine by Escherichia coli Whole Cell Biocatalyst Expressing Hafnia alvei l-lysine Decarboxylase
Source: PubMed Central journal article supplement (PMC6680443; doi:10.3390/polym11071184), 2019-07-14
Supplement: polymers-11-01184-s001.pdf [file polymers-11-01184-s001.pdf]

Supplementary File

# High-Level Conversion of L-lysine into Cadaverine by *Escherichia coli* Whole Cell Biocatalyst Expressing *Hafnia alvei* L-lysine Decarboxylase

Hee Taek Kim<sup>1,†</sup>, Kei-Anne Baritugo<sup>2,†</sup>, Young Hoon Oh<sup>1</sup>, Kyoung-Hee Kang<sup>1</sup>, Ye Jean Jung<sup>1,3</sup>, Seyoung Jang<sup>1</sup>, Bong Keun Song<sup>1</sup>, Il-Kwon Kim<sup>4</sup>, Myung Ock Lee<sup>5,6</sup>, Yong Taek Hwang<sup>5</sup>, Kyungmoon Park<sup>3</sup>, Si Jae Park<sup>2\*</sup>, Jeong Chan Joo<sup>1</sup>

<sup>1</sup> Bio-Based Chemistry Research Center, Advanced Convergent Chemistry Division, Korea Research Institute of Chemical Technology, P.O. Box 107, 141 Gajeong-ro, Yuseong-gu, Daejeon 34114, Korea

<sup>2</sup> Division of Chemical Engineering and Materials Science, Ewha Womans University, 52 Ewhayeodae-gil, Seodaemun-gu, Seoul 03760, Korea

<sup>3</sup> Department of Biological and Chemical Engineering, Hongik University, 2639 Sejong-ro, Sinan-ri, Jochiwon-eup, Sejong-si 30016, Korea

<sup>4</sup> Bioprocess R&D Center, DAESANG Corp., Icheon-si, Gyeonggi-do 17384, Korea

<sup>5</sup> Lotte Chemical, 115 Gajeongbuk-ro, Yuseong-gu, Daejeon 34110, Korea

<sup>6</sup> Department of Chemistry, KAIST, 291, Daehak-ro, Yuseong-gu, Daejeon 34141, Korea

\* Correspondence: parksj93@ewha.ac.kr (S.J.P.), jcjoo@kriict.re.kr (J.C.J.)

† Hee Taek Kim and Kei-Anne Baritugo contributed equally to this work.

**Figure S1.** SDS-PAGE analysis of recombinant *E.coli* BL21EcLDC and BL21HaLDC. Abbreviations: WCL – whole cell lysate, L – protein ladder, S – soluble fraction, IS- insoluble fraction.

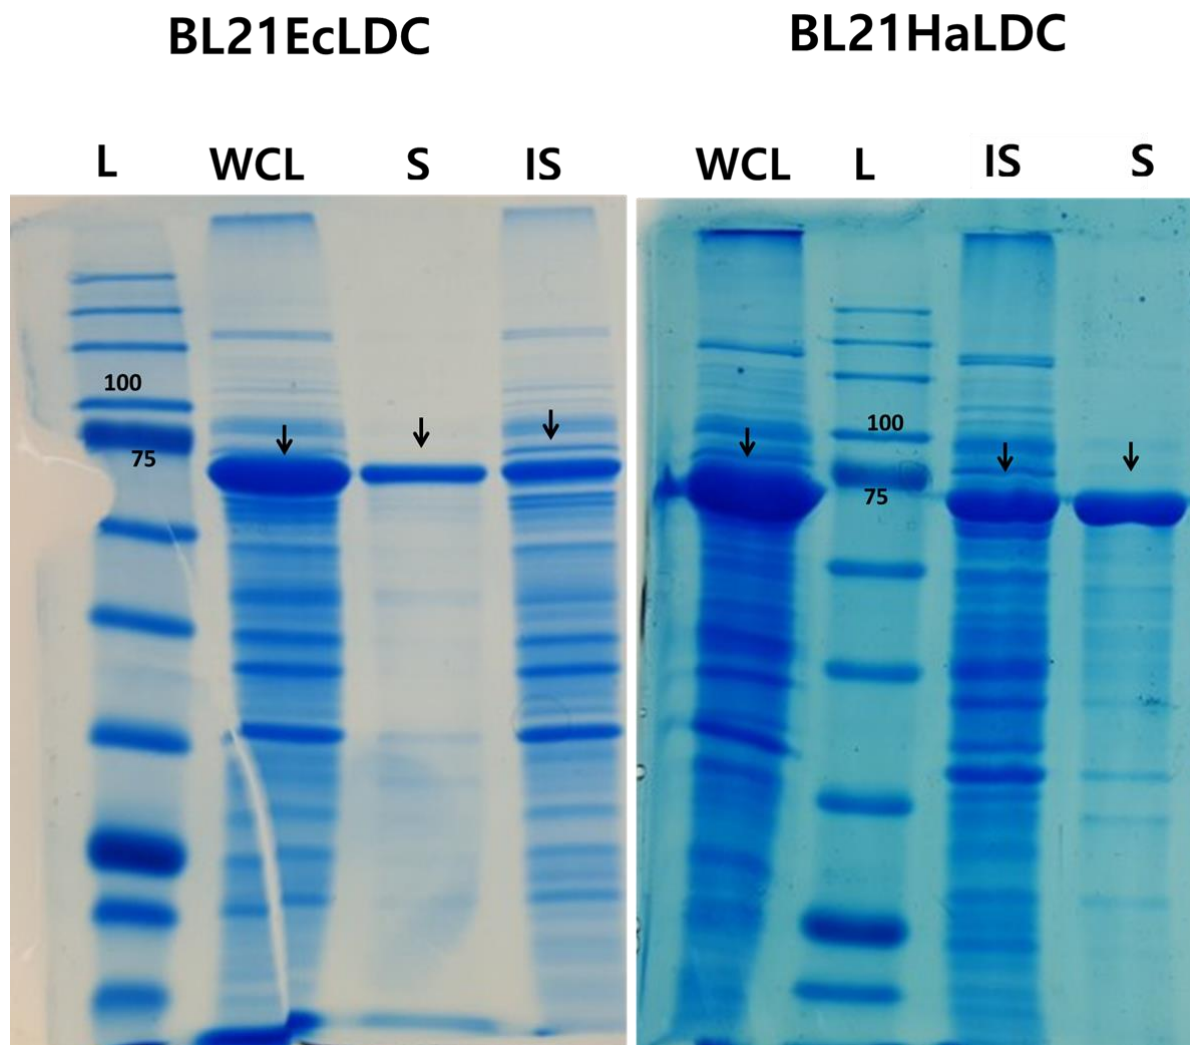

**Figure S2.** SDS-PAGE analysis of recombinant *E. coli* XBHaLDC and XBEcLDC after 96 h of cultivation in PLP-free MR medium with 20 g/L of glucose and 10 g/L g L-lysine. Lanes: 1 – *E. coli* XB wild type , MW- Molecular weight marker, 2 – XBEcLDC 24 h sample, 3 – XBEcLDC 24 h sample with IPTG induction, 4 – XBHaLDC 24 h sample, 5 – XBHaLDC, 24 h sample with IPTG induction, 6 – XBEcLDC 96 h sample, 7 – XBEcLDC 96 h sample with IPTG induction, 8 - XBHaLDC 96 h sample, 9 – XBHaLDC 96 h sample with IPTG induction.

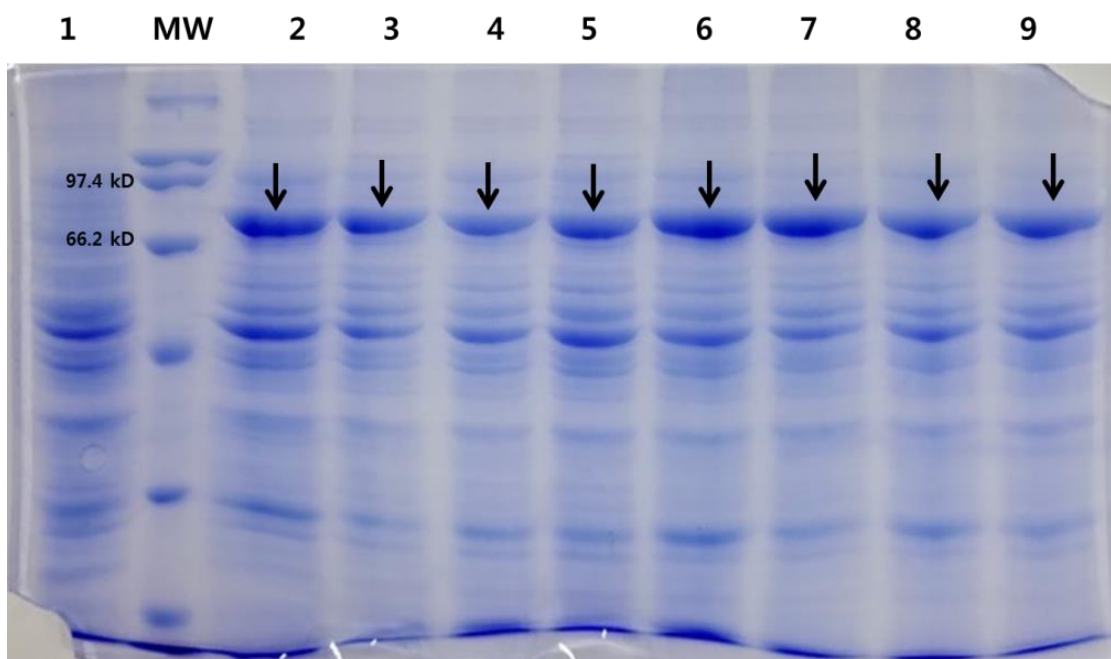

**Figure S3.** Decarboxylation of L-lysine into cadaverine by purified *E. coli* LDC and *H. alvei* LDC. Enzyme reactions were performed with the indicated concentration of L-lysine substrate (Symbols: filled blue circle, *E. coli* LDC; filled red circle, *H. alvei* LDC).

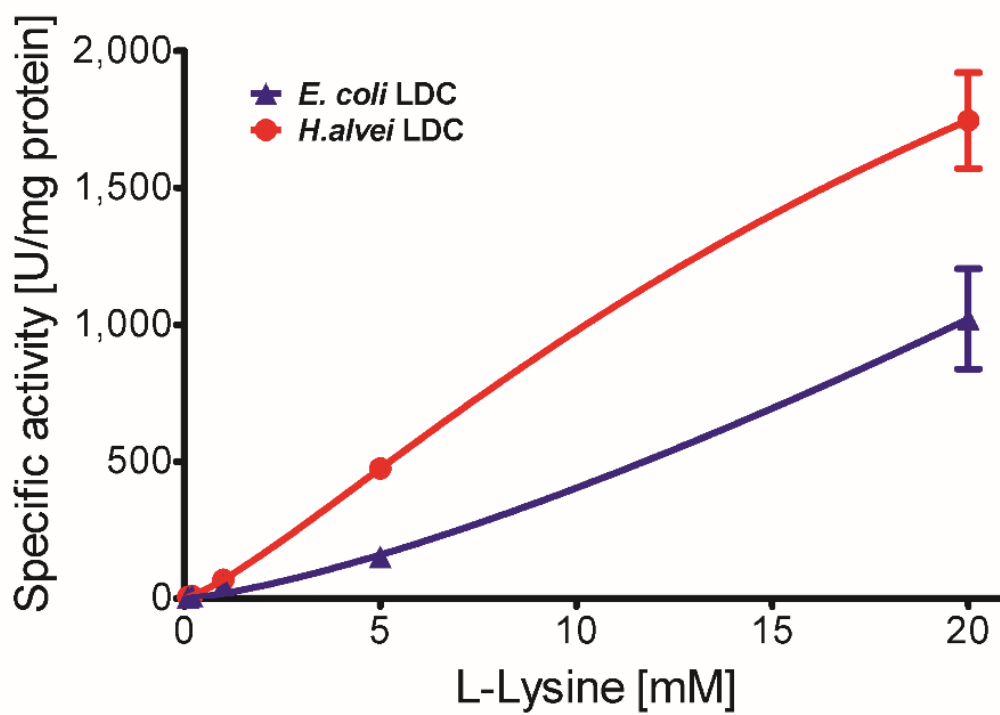

**Figure S4.** Results of nuclear magnetic resonance spectroscopy ( $^1\text{H}$  NMR spectra) (a) with detected solvent peaks [4.56–4.21 (multiplet, HFIP) and 7.27 (singlet,  $\text{CDCl}_3$ )] and detected cadaverine backbone peaks [6.09 (2H, t; peak a), 3.27 (4H, q; peak b), 2.23 (4H, t; peak e), 1.58–1.54 (8H, m; peak c,f), 1.33 (10H, B; peak d,g)]; differential scanning calorimetry (DSC) (b); and thermogravimetric (TGA) analysis (c) of bio-based polyamide PA510.

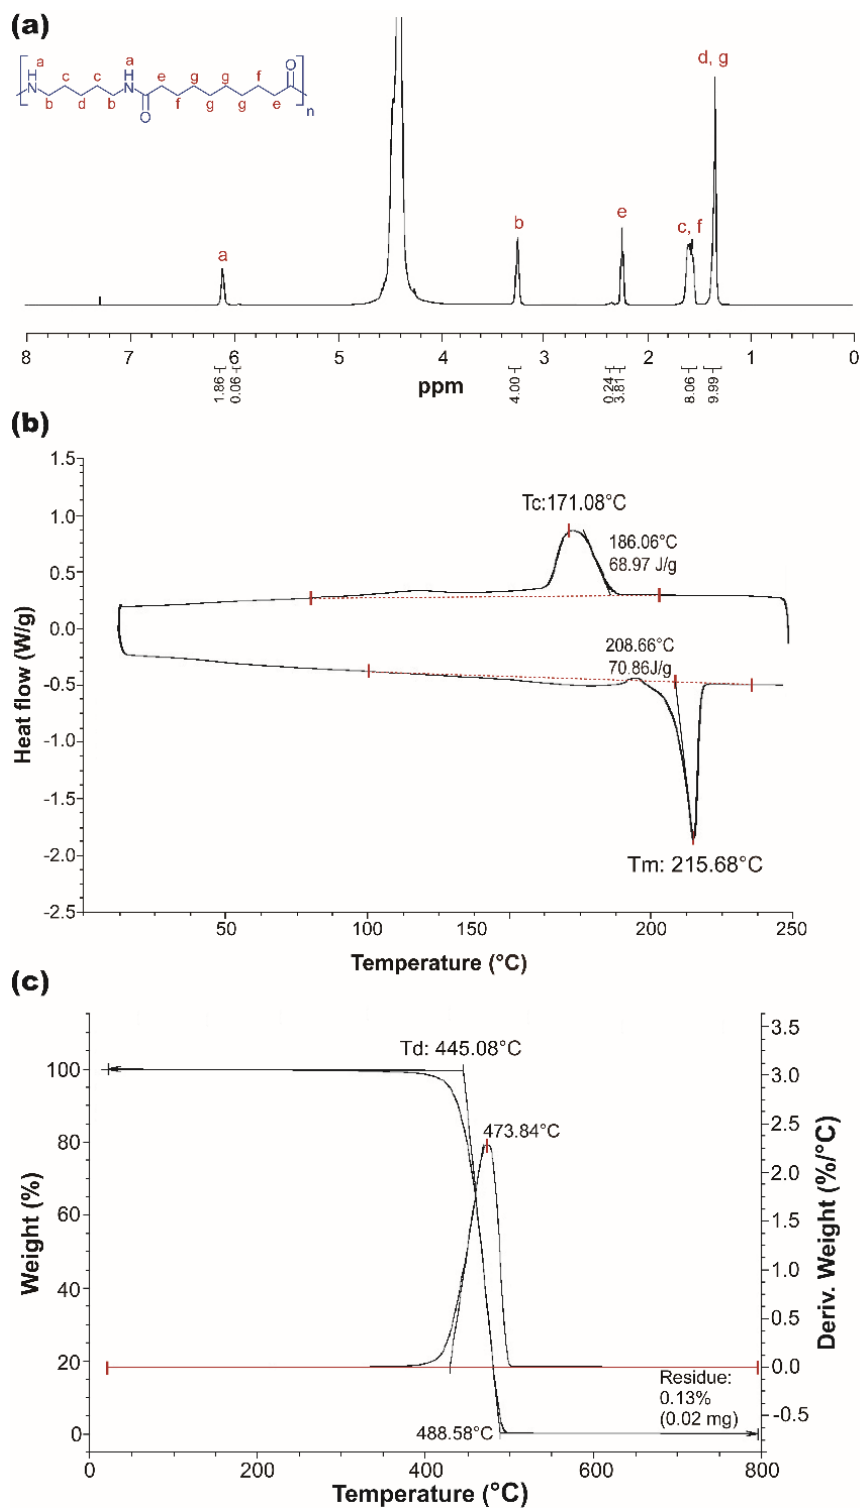

**Table S1.** Primers used in this study.

| Target Gene<br>(Vector)                          | Primer | Primer sequence                                                             |
|--------------------------------------------------|--------|-----------------------------------------------------------------------------|
| <i>ldcC</i> from <i>E. coli</i><br>(pKE112-MCS)  | F      | GGATCC ATGAACATCATTGCCATTATGGGAC                                            |
|                                                  | R      | CCTGCAGG TCCCGCCATTTTTAGGACTCG                                              |
| <i>ldc</i> from <i>H. alvei</i><br>(pKE112-MCS)  | F      | GGATCC ATGAATATCATTGCCATCATGAACG                                            |
|                                                  | R      | CCTGCAGG TGACTTCTTCGCCGCTGATG                                               |
| <i>ldcC</i> from <i>E. coli</i><br>(pET22-MCS)   | F      | TCTAGA<br>AATAATTTTGTTTAACTTTAAGAAGGAGATATACAT<br>ATGAACATCATTGCCATTATGGGAC |
|                                                  | R      | CTCGAG TCCCGCCATTTTTAGGACTCG                                                |
| <i>ldc</i> from <i>H. alvei</i><br>(pET22-MCS)   | F      | TCTAGA<br>AATAATTTTGTTTAACTTTAAGAAGGAGATATACAT<br>ATGAATATCATTGCCATCATGAACG |
|                                                  | R      | CTCGAG TGACTTCTTCGCCGCTGATG                                                 |
| <i>ldcC</i> from <i>E. coli</i><br>(pET24ma-MCS) | F      | AAGCTT ATGAACATCATTGCCATTATGGGAC                                            |
|                                                  | R      | CTCGAG TCCCGCCATTTTTAGGACTCG                                                |
| <i>ldc</i> from <i>H. alvei</i><br>(pET24ma-MCS) | F      | AAGCTT ATGAATATCATTGCCATCATGAACG                                            |
|                                                  | R      | CTCGAG TGACTTCTTCGCCGCTGATG                                                 |
